# Supplementary material for: Does Parenting Perfectionism Ironically Increase Violent Behaviors from Parent towards Children?
Source: MDPI journal article supplement (doi:10.3390/children10101704), 2023-10-19
Supplement: s1 [file s1]

## Supplementary Materials

**Figure S1.** *Cross-Lag Model Investigating the Mediating Role of Parental Burnout Between Perfectionistic Strivings and Violence Towards the Offspring*

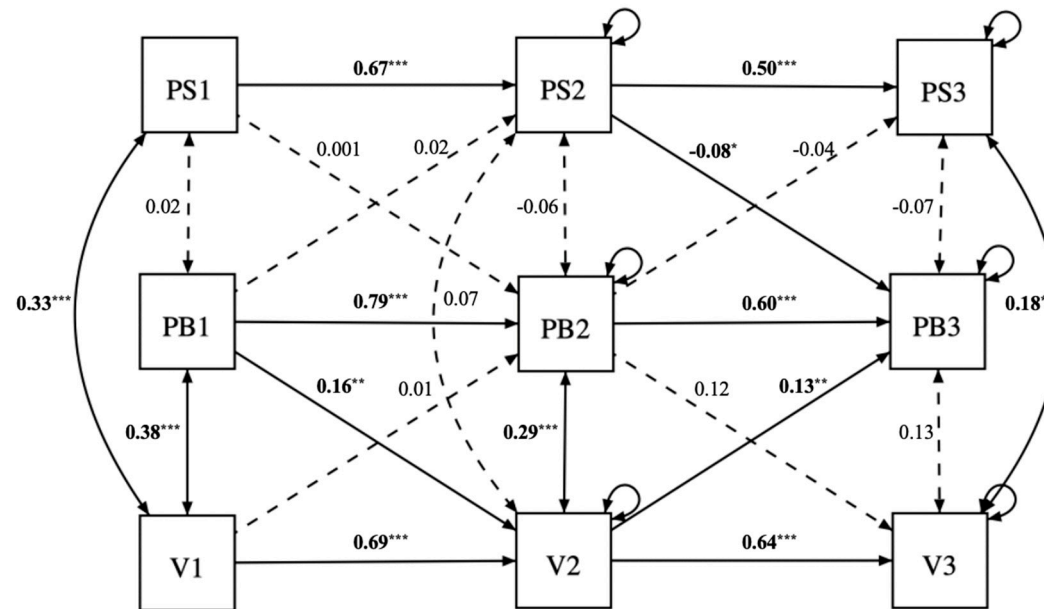

*Note.* PS1 = Perfectionistic Strivings at Time 1. PS2 = Perfectionistic Strivings at Time 2. PS3 = Perfectionistic Strivings at Time 3. PB1 = Parental Burnout at Time 1. PB2 = Parental Burnout at Time 2. PB3 = Parental Burnout at Time 3. V1 = Violence at Time 1. V2 = Violence at Time 2. V3 = Violence at Time 3. Significant paths and covariances are in black and their standardized coefficients are

marked in bold with asterisks (\* $p < .05$ , \*\* $p < .01$ , \*\*\* $p < .001$ ). Non-significant paths and covariances are depicted with dotted lines, and their coefficients are not in bold and with no asterisks. Bootstrapping = 1000 samples.

The first mediation model comprising perfectionistic strivings had an initial inadequate fit to the data:  $\chi^2(15) = 162.52$ ,  $p < .001$ ; CFI = .89; TLI = .73; RMSEA = 0.21, 95% CI = [0.18, 0.24], SRMR = .15. When covariances between highly correlated variables were added, the model showed better fit:  $\chi^2(7) = 67.98$ ,  $p < .001$ ; CFI = .95; TLI = .76; RMSEA = 0.19, 95% CI = [0.16, 0.24], SRMR = .04. Yet, as shown in **Figure S1** hereinabove, we did not find support for the hypothesized mediation. The results of the model did not change when controlling for social desirability.

**Figure S2.** Cross-Lag Model Investigating the Mediating Role of Parental Burnout Between Perfectionistic Concerns and Violence Towards the Offspring

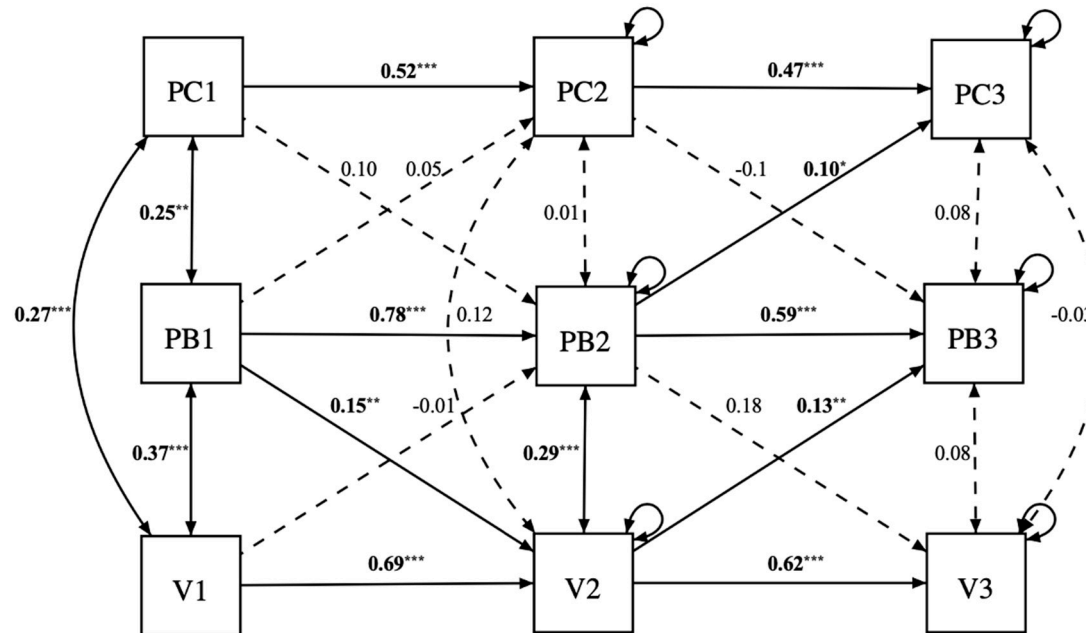

*Note.* PC1 = Perfectionistic Concerns at Time 1. PC2 = Perfectionistic Concerns at Time 2. PC3 = Perfectionistic Concerns at Time 3. PB1 = Parental Burnout at Time 1. PB2 = Parental Burnout at Time 2. PB3 = Parental Burnout at Time 3. V1 = Violence at Time 1. V2 = Violence at Time 2. V3 = Violence at Time 3. Significant paths and covariances are in black and their standardized coefficients are

marked in bold with asterisks (\* $p < .05$ , \*\* $p < .01$ , \*\*\* $p < .001$ ). Non-significant paths and covariances are depicted with dotted lines, and their coefficients are not in bold and with no asterisks. Bootstrapping = 1000 samples.

The second mediation model comprising perfectionistic concerns also had an initial bad fit to the data:  $\chi^2(15) = 147.91$ ,  $p < .001$ ; CFI = .89; TLI = .74; RMSEA = 0.20, 95% CI = [0.17, 0.23], SRMR = .12. After covariances were added, the final model had a better fit to the data:  $\chi^2(4) = 57.33$ ,  $p < .001$ ; CFI = .96; TLI = .60; RMSEA = 0.22, 95% CI = [0.18, 0.29], SRMR = .04. However, as shown in **Figure S2** hereinabove, we did not find support for the hypothesized mediation. These same results were observed when adding and controlling for social desirability.

**Table S1.** Mediation Analyses between Perfectionistic Concerns, Parental Burnout, and Violence towards the Offspring, all at Time 1

| Effect          | Standardized<br>Estimate | SE    | 95% CI |      | Z    | p        |
|-----------------|--------------------------|-------|--------|------|------|----------|
|                 |                          |       | LL     | UL   |      |          |
| Indirect (a*b)  | 0.04                     | 0.004 | 0.002  | 0.02 | 2.48 | .001**   |
| PB1 → PC1       | 0.24                     | 0.01  | 0.01   | 0.04 | 3.44 | <.001*** |
| PC1 → V1        | 0.18                     | 0.13  | 0.15   | 0.66 | 3.19 | .001**   |
| Direct (c)      | 0.32                     | 0.02  | 0.04   | 0.12 | 4.27 | <.001*** |
| Total (c + a*b) | 0.37                     | 0.02  | 0.06   | 0.13 | 5.13 | <.001*** |

*Note.* PB1 = Parental Burnout at Time 1. PC1 = Perfectionistic Concerns at Time 1. V1 = Violence at Time 1. Bootstrapping = 1000

samples. \*p < .05. \*\*p < .01. \*\*\*p < .001.
